# Supplementary material for: SSeCKS/Akap12 suppresses metastatic melanoma lung colonization by attenuating Src-mediated pre-metastatic niche crosstalk
Source: PubMed Central journal article supplement (PMC6173366; doi:10.18632/oncotarget.26067), 2018-09-11
Supplement: oncotarget-09-33515-s001.pdf [file oncotarget-09-33515-s001.pdf]

## SSeCKS/Akap12 suppresses metastatic melanoma lung colonization by attenuating Src-mediated pre-metastatic niche crosstalk

### SUPPLEMENTARY MATERIALS

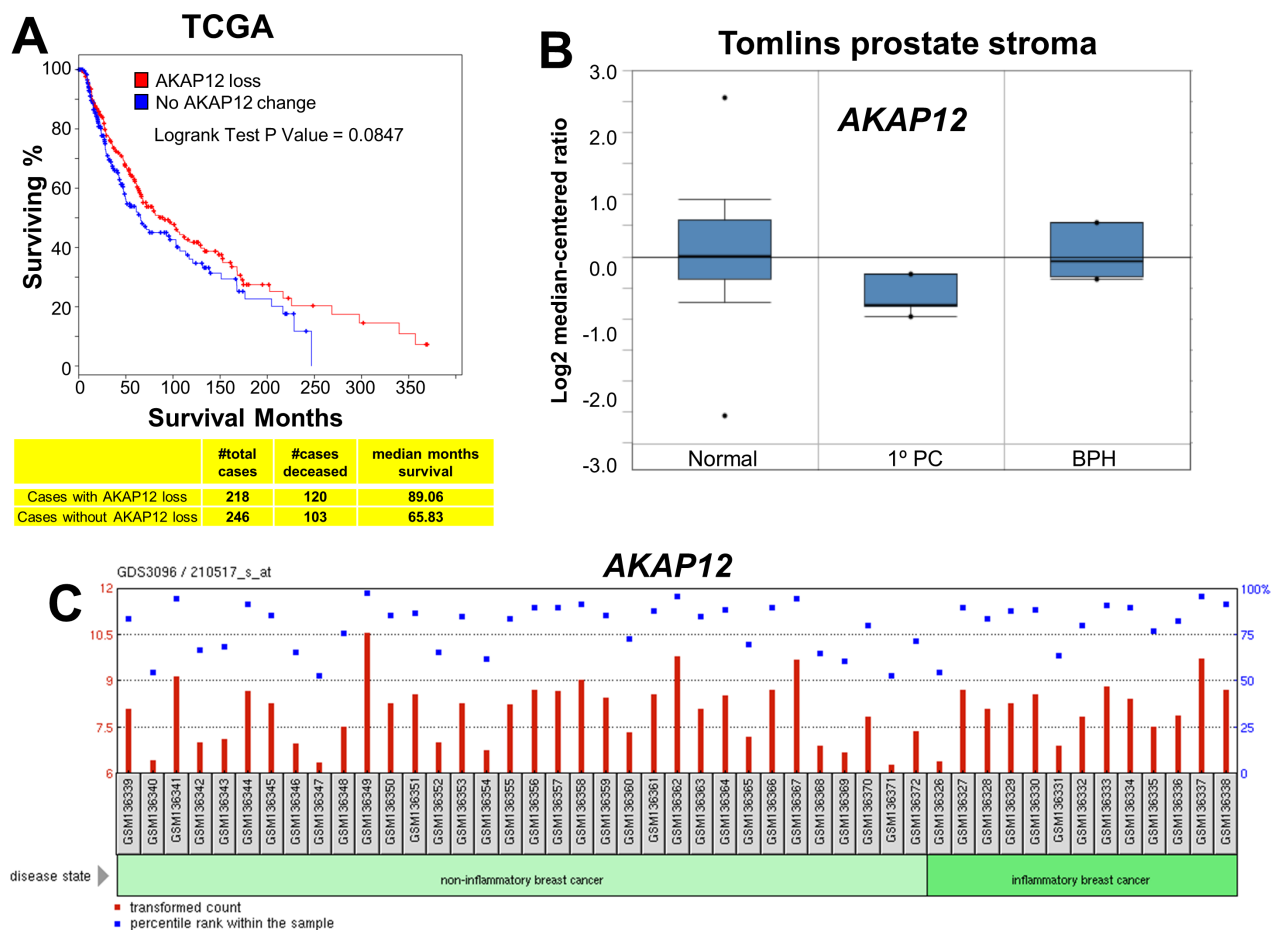

**Supplementary Figure 1: AKAP12 expression in melanoma survival, or in human prostate- or breast-associated stroma.** (A) Correlation of relative *AKAP12* expression with survival in the TCGA cohort (total  $n = 464$ ), the  $p$  value being not significant. (B) Relative *AKAP12* expression of normal, primary tumor (1°PC) and benign prostatic hyperplasia (BPH)-associated stroma in human prostate cancers from the Oncomine Tomlins Prostate dataset. (C) Relative *AKAP12* expression in the stroma from inflammatory vs. non-inflammatory human breast cancers from GEO study GDS3096.

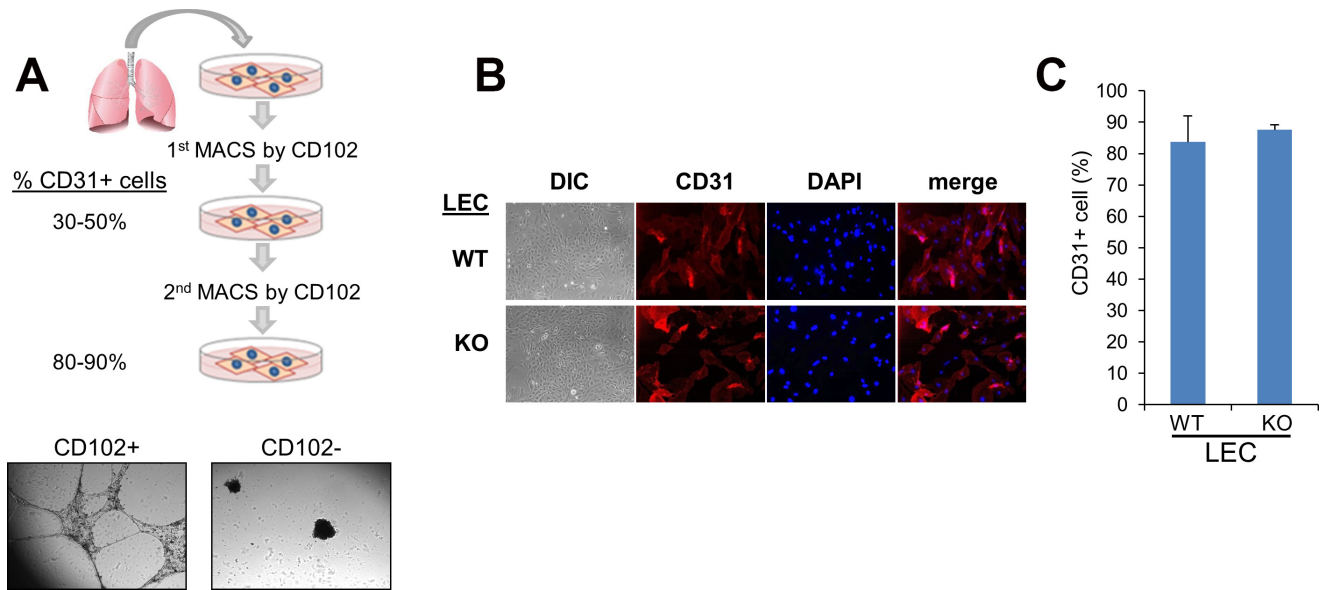

**Supplementary Figure 2: Confirmation of endothelial enrichment after CD102 MACS.** (A) *Top.* FACS quantification of CD31 positivity after 1 of 2 rounds of MACS-CD102 selection of mouse lung cells. *Bottom.* Functional confirmation of LEC after second MACS-CD102 round using a tube formation assay [21]. Note that the CD102<sup>-</sup> flow-through fraction, which represented LF, failed to form tubes, whereas the CD102<sup>+</sup> LEC did. (B) CD31 and DAPI staining of WT- and KO-LEC after the 2nd MACS-CD102 selection. (C) Percentage of CD31<sup>+</sup> cells assessed by FACS analysis after two rounds of MACS-CD102 selection. Error bars, SEM of LEC from 6 lungs.
